# Supplementary material
Source: publisher figshare collection journal article supplement (https://aacr.figshare.com/articles/dataset/_/23905265)
Supplement: Supplementary file 1 [file 41911448]

**Supplemental material: Multiomic mapping of acquired chromosome 1 copy number and structural variants to identify therapeutic vulnerabilities in multiple myeloma.**

Eileen M. Boyle<sup>1,11,12</sup>, Patrick Blaney<sup>1,2,11</sup>, James H Stoeckle<sup>1,11</sup>, Yubao Wang<sup>1</sup>, Hussein Ghamlouch<sup>1</sup>, Dylan Gagler<sup>1,2</sup>, Marc Braunstein<sup>1</sup>, Louis Williams<sup>1,3</sup>, Avital Tenenbaum<sup>1</sup>, Ariel Siegel<sup>1</sup>, Chiaoyi Chen<sup>1</sup>, Gaurav Varma<sup>1</sup>, Jason Avigan<sup>1</sup>, Alexander Li<sup>1</sup>, Monica Jinsi<sup>1</sup>, David Kaminetzsky<sup>1</sup>, Arnaldo Arbini<sup>1</sup>, Lydia Montes<sup>4</sup>, Jill Corre<sup>5</sup>, Even H Rustad<sup>6</sup>, Ola Landgren<sup>7</sup>, Francesco Maura<sup>7</sup>, Brian A. Walker<sup>8</sup>, Michael Bauer<sup>9</sup>, Benedetto Bruno<sup>10</sup>, Aristotelis Tsirigos<sup>2</sup>, Faith E. Davies<sup>1</sup>, Gareth J. Morgan<sup>1,13</sup>

1. Myeloma Research Program, Perlmutter Cancer Center, NYU Langone Medical Center, New York, NY, USA
2. Applied Bioinformatics Laboratories, NYU Langone Medical Center, New York, NY, USA
3. Myeloma Group, Cleveland Clinic Foundation, Taussig Cancer Center, Cleveland, OH, USA
4. Universite d'Amiens-Picardie, Amiens, France
5. Unit for Genomics in Myeloma, Institut Universitaire du Cancer de Toulouse-Oncopole, University Hospital, Toulouse; Centre de Recherche en Cancérologie de Toulouse, Institut National de la Santé et de la Recherche Médicale U1037, Toulouse, France
6. Institute for Cancer Research, Oslo University Hospital Radiumhospitalet, Oslo, Norway
7. Myeloma Service, Sylvester Comprehensive Cancer Center, University of Miami, Miami, FL, USA
8. Melvin and Bren Simon Comprehensive Cancer Center, Department of Hematology Oncology, Indiana University, Indianapolis, IN, USA
9. Department of Biomedical Informatics (DBMI), UAMS, Little-Rock, AR, USA
10. Department of Hematology, Azienda Ospedaliera Citta della Salute e della Scienza di Torino, Piemonte, Italy
11. Contributed equally
12. Corresponding for manuscript submission
13. Corresponding author

**Supplemental Methods*****DepMap analysis***

Functional genomics, DepMap genome wide CRISPR knockout library (24), was applied to 19 myeloma cell lines and 15 non myeloma cell lines selected and clustered based on their dependency score to generate a heatmap (heatmap.2) (25) Enrichment for SV on 1q and 1p was analysed by comparing the proportion of positive cases or measures of the mean value in one subgroup with the remaining samples using dependency as a continuous variable. Absolute fold change (FC) greater than 0.15 with p-value less than 0.05 were considered significant.

***Statistical analysis***

Proportional testing was performed using Kruskal-Wallis or Fisher's exact tests to compare the median of a continuous variable or the distribution of discrete variables across groups, when appropriate.
